# Supplementary material for: Sub-basin-scale sea level budgets from satellite altimetry, Argo floats and satellite gravimetry: a case study in the North Atlantic Ocean
Source: Copernicus journal article supplement (doi:10.5194/os-12-1179-2016), 2016-11-15
Supplement: Supplementary file 1 [file os-12-1179-2016-supplement.zip]

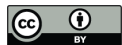

## *Supplement of*

# **Sub-basin-scale sea level budgets from satellite altimetry, Argo floats and satellite gravimetry: a case study in the North Atlantic Ocean**

**Marcel Kleinherenbrink et al.**

*Correspondence to:* Marcel Kleinherenbrink (m.kleinherenbrink@tudelft.nl)

- os-12-1179-2016-supplement-title-page.pdf
- Grids
  - ARGGRACESUMTrendsAmplitudes
    - \* Amplitudes
    - \* README
    - \* README
    - \* Trends
  - AltimetryTrendsAmplitudes
    - \* Amplitudes
    - \* README
    - \* README
    - \* Trends
  - ArgoTrendsAmplitudes
    - \* Amplitudes
    - \* README
    - \* README
    - \* Trends
  - GRACETrendsAmplitudes
    - \* Amplitudes
    - \* README
    - \* README
    - \* Trends
- Timeseries
  - Mass
    - \* AtlanticA\_mass60.ascii

- \* AtlanticA\_mass90.ascii
- \* AtlanticA\_mass96.ascii
- \* AtlanticA\_residuals60.ascii
- \* AtlanticA\_residuals90.ascii
- \* AtlanticA\_residuals96.ascii
- \* AtlanticB\_mass60.ascii
- \* AtlanticB\_mass90.ascii
- \* AtlanticB\_mass96.ascii
- \* AtlanticB\_residuals60.ascii
- \* AtlanticB\_residuals90.ascii
- \* AtlanticB\_residuals96.ascii
- \* AtlanticC\_mass60.ascii
- \* AtlanticC\_mass90.ascii
- \* AtlanticC\_mass96.ascii
- \* AtlanticC\_residuals60.ascii
- \* AtlanticC\_residuals90.ascii
- \* AtlanticC\_residuals96.ascii
- \* AtlanticD\_mass60.ascii
- \* AtlanticD\_mass90.ascii
- \* AtlanticD\_mass96.ascii
- \* AtlanticD\_residuals60.ascii
- \* AtlanticD\_residuals90.ascii
- \* AtlanticD\_residuals96.ascii
- \* AtlanticE\_mass60.ascii
- \* AtlanticE\_mass90.ascii
- \* AtlanticE\_mass96.ascii
- \* AtlanticE\_residuals60.ascii
- \* AtlanticE\_residuals90.ascii
- \* AtlanticE\_residuals96.ascii
- \* AtlanticF\_mass60.ascii
- \* AtlanticF\_mass90.ascii
- \* AtlanticF\_mass96.ascii
- \* AtlanticF\_residuals60.ascii
- \* AtlanticF\_residuals90.ascii
- \* AtlanticF\_residuals96.ascii
- \* AtlanticG\_mass60.ascii
- \* AtlanticG\_mass90.ascii
- \* AtlanticG\_mass96.ascii
- \* AtlanticG\_residuals60.ascii
- \* AtlanticG\_residuals90.ascii
- \* AtlanticG\_residuals96.ascii
- \* AtlanticH\_mass60.ascii
- \* AtlanticH\_mass90.ascii
- \* AtlanticH\_mass96.ascii
- \* AtlanticH\_residuals60.ascii
- \* AtlanticH\_residuals90.ascii
- \* AtlanticH\_residuals96.ascii

- \* AtlanticI\_mass60.ascii
- \* AtlanticI\_mass90.ascii
- \* AtlanticI\_mass96.ascii
- \* AtlanticI\_residuals60.ascii
- \* AtlanticI\_residuals90.ascii
- \* AtlanticI\_residuals96.ascii
- \* AtlanticJ\_mass60.ascii
- \* AtlanticJ\_mass90.ascii
- \* AtlanticJ\_mass96.ascii
- \* AtlanticJ\_residuals60.ascii
- \* AtlanticJ\_residuals90.ascii
- \* AtlanticJ\_residuals96.ascii
- README
- README
- Steric
  - \* AtlanticA\_residuals.ascii
  - \* AtlanticA\_steric.ascii
  - \* AtlanticB\_residuals.ascii
  - \* AtlanticB\_steric.ascii
  - \* AtlanticC\_residuals.ascii
  - \* AtlanticC\_steric.ascii
  - \* AtlanticD\_residuals.ascii
  - \* AtlanticD\_steric.ascii
  - \* AtlanticE\_residuals.ascii
  - \* AtlanticE\_steric.ascii
  - \* AtlanticF\_residuals.ascii
  - \* AtlanticF\_steric.ascii
  - \* AtlanticG\_residuals.ascii
  - \* AtlanticG\_steric.ascii
  - \* AtlanticH\_residuals.ascii
  - \* AtlanticH\_steric.ascii
  - \* AtlanticI\_residuals.ascii
  - \* AtlanticI\_steric.ascii
  - \* AtlanticJ\_residuals.ascii
  - \* AtlanticJ\_steric.ascii
- StericMass
  - \* ArgoGravA\_error60
  - \* ArgoGravA\_error90
  - \* ArgoGravA\_error96
  - \* ArgoGravA\_residuals60
  - \* ArgoGravA\_residuals90
  - \* ArgoGravA\_residuals96
  - \* ArgoGravA\_timeseries60
  - \* ArgoGravA\_timeseries90
  - \* ArgoGravA\_timeseries96
  - \* ArgoGravB\_error60
  - \* ArgoGravB\_error90

- \* ArgoGravB\_error96
- \* ArgoGravB\_residuals60
- \* ArgoGravB\_residuals90
- \* ArgoGravB\_residuals96
- \* ArgoGravB\_timeseries60
- \* ArgoGravB\_timeseries90
- \* ArgoGravB\_timeseries96
- \* ArgoGravC\_error60
- \* ArgoGravC\_error90
- \* ArgoGravC\_error96
- \* ArgoGravC\_residuals60
- \* ArgoGravC\_residuals90
- \* ArgoGravC\_residuals96
- \* ArgoGravC\_timeseries60
- \* ArgoGravC\_timeseries90
- \* ArgoGravC\_timeseries96
- \* ArgoGravD\_error60
- \* ArgoGravD\_error90
- \* ArgoGravD\_error96
- \* ArgoGravD\_residuals60
- \* ArgoGravD\_residuals90
- \* ArgoGravD\_residuals96
- \* ArgoGravD\_timeseries60
- \* ArgoGravD\_timeseries90
- \* ArgoGravD\_timeseries96
- \* ArgoGravE\_error60
- \* ArgoGravE\_error90
- \* ArgoGravE\_error96
- \* ArgoGravE\_residuals60
- \* ArgoGravE\_residuals90
- \* ArgoGravE\_residuals96
- \* ArgoGravE\_timeseries60
- \* ArgoGravE\_timeseries90
- \* ArgoGravE\_timeseries96
- \* ArgoGravF\_error60
- \* ArgoGravF\_error90
- \* ArgoGravF\_error96
- \* ArgoGravF\_residuals60
- \* ArgoGravF\_residuals90
- \* ArgoGravF\_residuals96
- \* ArgoGravF\_timeseries60
- \* ArgoGravF\_timeseries90
- \* ArgoGravF\_timeseries96
- \* ArgoGravG\_error60
- \* ArgoGravG\_error90
- \* ArgoGravG\_error96
- \* ArgoGravG\_residuals60

- \* ArgoGravG\_residuals90
- \* ArgoGravG\_residuals96
- \* ArgoGravG\_timeseries60
- \* ArgoGravG\_timeseries90
- \* ArgoGravG\_timeseries96
- \* ArgoGravH\_error60
- \* ArgoGravH\_error90
- \* ArgoGravH\_error96
- \* ArgoGravH\_residuals60
- \* ArgoGravH\_residuals90
- \* ArgoGravH\_residuals96
- \* ArgoGravH\_timeseries60
- \* ArgoGravH\_timeseries90
- \* ArgoGravH\_timeseries96
- \* ArgoGravI\_error60
- \* ArgoGravI\_error90
- \* ArgoGravI\_error96
- \* ArgoGravI\_residuals60
- \* ArgoGravI\_residuals90
- \* ArgoGravI\_residuals96
- \* ArgoGravI\_timeseries60
- \* ArgoGravI\_timeseries90
- \* ArgoGravI\_timeseries96
- \* ArgoGravJ\_error60
- \* ArgoGravJ\_error90
- \* ArgoGravJ\_error96
- \* ArgoGravJ\_residuals60
- \* ArgoGravJ\_residuals90
- \* ArgoGravJ\_residuals96
- \* ArgoGravJ\_timeseries60
- \* ArgoGravJ\_timeseries90
- \* ArgoGravJ\_timeseries96

– Total

- \* AltimetryA\_error
- \* AltimetryA\_residuals
- \* AltimetryA\_timeseries
- \* AltimetryB\_error
- \* AltimetryB\_residuals
- \* AltimetryB\_timeseries
- \* AltimetryC\_error
- \* AltimetryC\_residuals
- \* AltimetryC\_timeseries
- \* AltimetryD\_error
- \* AltimetryD\_residuals
- \* AltimetryD\_timeseries
- \* AltimetryE\_error
- \* AltimetryE\_residuals

- \* AltimetryE\_timeseries
- \* AltimetryF\_error
- \* AltimetryF\_residuals
- \* AltimetryF\_timeseries
- \* AltimetryG\_error
- \* AltimetryG\_residuals
- \* AltimetryG\_timeseries
- \* AltimetryH\_error
- \* AltimetryH\_residuals
- \* AltimetryH\_timeseries
- \* AltimetryI\_error
- \* AltimetryI\_residuals
- \* AltimetryI\_timeseries
- \* AltimetryJ\_error
- \* AltimetryJ\_residuals
- \* AltimetryJ\_timeseries

- os-2016-50-supplement-version4.pdf

The copyright of individual parts of the supplement might differ from the CC-BY 3.0 licence.
