# Supplementary material for: Sub-basin-scale sea level budgets from satellite altimetry, Argo floats and satellite gravimetry: a case study in the North Atlantic Ocean
Source: Copernicus journal article supplement (doi:10.5194/os-12-1179-2016), 2016-11-15
Supplement: Supplementary file 2 [file os-12-1179-2016-supplement.zip]

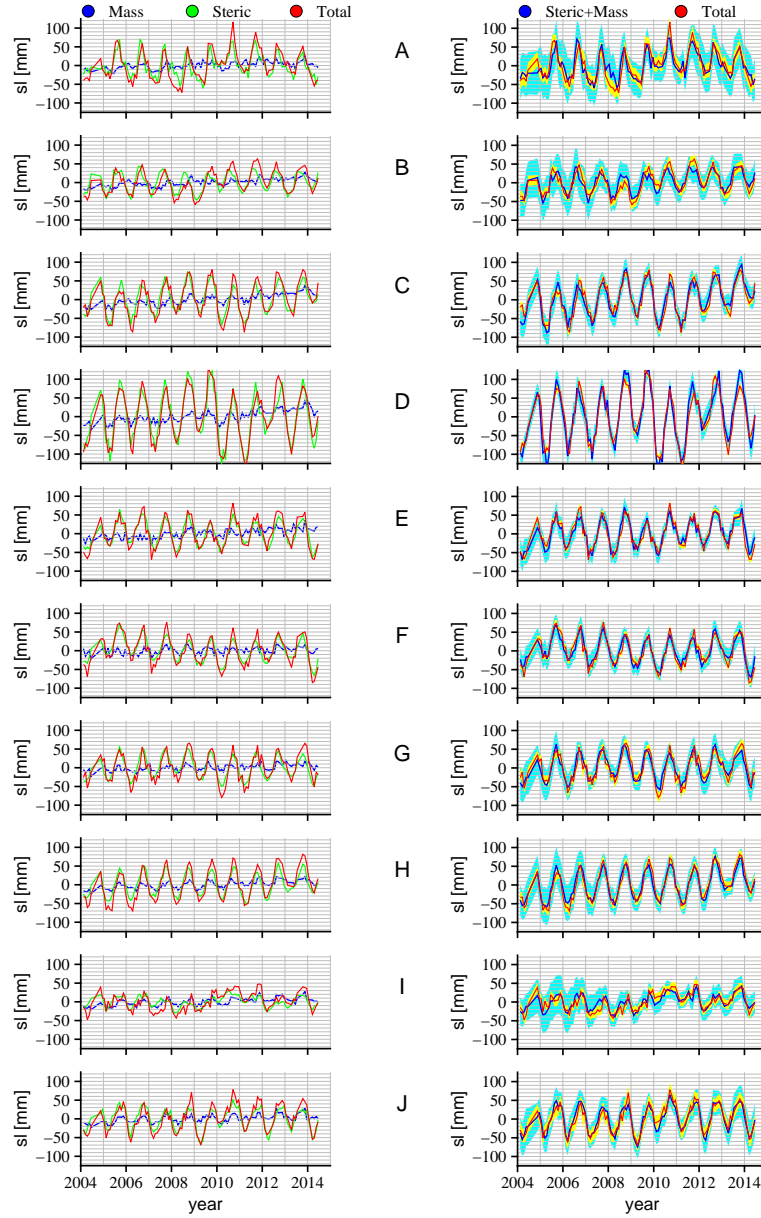

**Figure S1.** Time series of sea level (sl) budgets of the sub-basins. In both graphs the red line indicates the total MSL from altimetry. In the left graphs the green line indicates the steric sea level from Argo and the blue line respectively the mass component from ITSG90-W. In the right graph the blue line represents the sum of the steric and the mass components. The corresponding 95% confidence intervals are given in yellow and light blue.

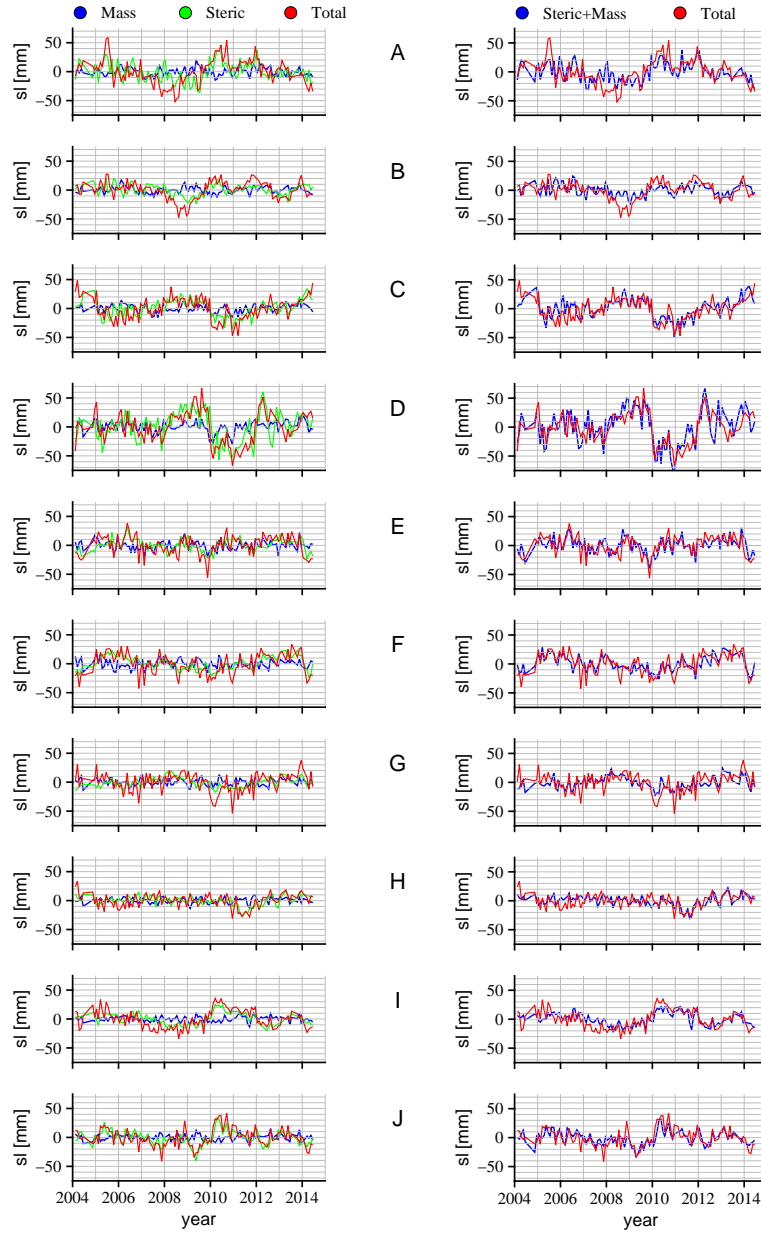

**Figure S2.** Time series of residual sea level (sl) budgets of the sub-basins. In both graphs the red line indicates the total MSL from altimetry. In the left graphs the green line indicates the steric sea level from Argo and the blue line respectively mass component from ITSG90-W. In the right graph the blue line represents the sum of the steric and the mass components.
